# Supplementary material for: Evolutionarily conserved genetic interactions with budding and fission yeast MutS identify orthologous relationships in mismatch repair-deficient cancer cells
Source: PubMed Central journal article supplement (PMC4189729; doi:10.1186/s13073-014-0068-4), 2014-09-17
Supplement: 13073_2014_68_MOESM1_ESM.pdf [file 13073_2014_68_MOESM1_ESM.pdf]

**Evolutionarily conserved genetic interactions with budding and fission yeast  
*MutS* identify orthologous relationships in mismatch repair-deficient cancer cells**

Elena Tosti <sup>1</sup>, Joseph A. Katakowski <sup>2</sup>, Sonja Schaezlein <sup>1</sup>, Hyun-Soo Kim <sup>1</sup>, Colm J. Ryan <sup>3,4,5</sup>,  
Michael Shales <sup>3</sup>, Assen Roguev <sup>3</sup>, Nevan J. Krogan <sup>3,4,6</sup>, Deborah Palliser <sup>2</sup>,  
Michael-Christopher Keogh <sup>1,\*</sup> & Winfried Edelmann <sup>1,\*</sup>

<sup>1</sup> Dept. of Cell Biology, Albert Einstein College of Medicine, New York, USA

<sup>2</sup> Dept. of Microbiology & Immunology, Albert Einstein College of Medicine, New York, USA

<sup>3</sup> Dept. of Cellular & Molecular Pharmacology, UCSF, San Francisco, USA

<sup>4</sup> California Institute for Quantitative Biosciences, San Francisco, USA

<sup>5</sup> School of Medicine and Medical Science, University College Dublin, Ireland

<sup>6</sup> J. David Gladstone Institutes, San Francisco, USA

\* To whom correspondence should be addressed -

Email: michael.keogh@einstein.yu.edu, winfried.edelmann@einstein.yu.edu

Tel: 718 430 1086

Fax: 718 430 8574

Supplementary Information  
2 x Supplementary Figures + Legends  
Supplementary References

## SUPPLEMENTARY INFORMATION

**siRNA sequences** - *HEC59* cancer cells (*MSH2*<sup>-</sup>) and their isogenic chromosome 2-complemented counterparts (*MSH2*<sup>+</sup>) [1] in six-well plates were transfected with siRNAs (*Dharmacon*) and *TransIT-siQUEST* (*Mirus*) by specific optimization of the manufacturers suggested conditions. Each targeted siRNA gave a similar result (with regard to knockdown and phenotypic outcome) when used individually or appropriately pooled, reducing the likelihood of off-target effects.

*siSENP6-1* (sense strand): GGACCAAUCUGCUCAGUGU [2]

*siSENP6-C* (sense strand): GCACAGAUACCAGUAGUAA

*siSENP7-1* (sense strand): GGAAAGAAGCCUAAGGAAU

*siSENP7-2* (sense strand): GAGAAGAAUUGAAGCUGAA

*siNT-1* (sense strand): UAGCGACUAAACACAUCAA

## SUPPLEMENTARY FIGURE LEGENDS

**Figure S1 - Specificity of anti-SENP6.** *SENP6* protein levels in permeabilized *HEC59* cells (*MSH2*<sup>-</sup>) were measured by fluorescence cytometry. In brief, cells were trypsinized, stained with *LIVE/DEAD fixable violet* (*Invitrogen*), fixed with 2% paraformaldehyde, and permeabilized as noted. Each sample was then successively stained with monoclonal mouse anti-human *SENP6* ( $\alpha$ *SENP6*; *Novus Biologicals*) or an IgG2a-isotype control (*eBioscience*) and anti-mouse IgG2a-PE (2<sup>nd</sup> Ab; *eBioscience*), and analyzed by fluorescence cytometry. **(A)** Optimization of permeabilization approach (0.3% Saponin vs. 0.1% Triton X-100). **(B)** Titration of monoclonal mouse anti-human *SENP6* (\*, 1:400 chosen) after permeabilization with 0.3% Saponin.

**Figure S2 - Polysumoylation is lethal in *msh2Δ* fission yeast.** Strains were mated, sporulated, and the indicated number of tetrads dissected. The number of viable spores observed / expected (assuming independent Mendelian segregation) for each genotype is indicated. **(B-C)** *msh2Δ* is synthetic lethal with *ulp2Δ* but shows no genetic interaction with *ulp1Δ*. **(D-F)** *smt3Δ* or *nse2-SA* (catalytic dead *nse2-C195S, H197A*), but not *pli1Δ*, rescue the lethality of [*msh2Δ* / *ulp2Δ*]. \*\* Msh2 and Smt3 are genetically linked (separated by only 159,352bp on chromosome I), explaining the unexpectedly large number of triple mutant spores.

## SUPPLEMENTARY REFERENCES

1. Watanabe Y, Haugen-Strano A, Umar A, Yamada K, Hemmi H, Kikuchi Y, Takano S, Shibata Y, Barrett JC, Kunkel TA, Koi M: **Complementation of an hMSH2 defect in human colorectal carcinoma cells by human chromosome 2 transfer.** *Mol Carcinog* 2000, **29**:37-49.
2. Dou H, Huang C, Singh M, Carpenter PB, Yeh ET: **Regulation of DNA repair through deSUMOylation and SUMOylation of replication protein A complex.** *Mol Cell* 2010, **39**:333-345.

Figure S1: Tosti et al

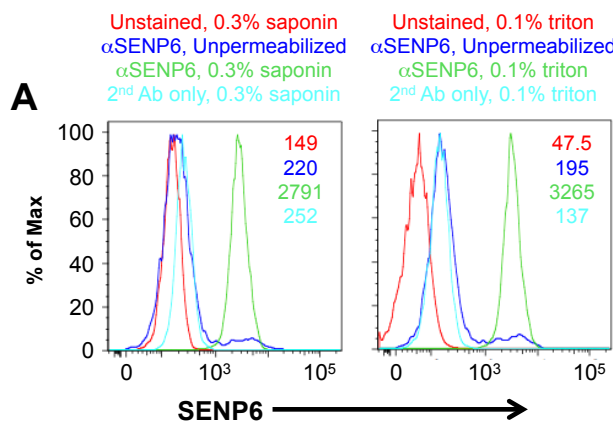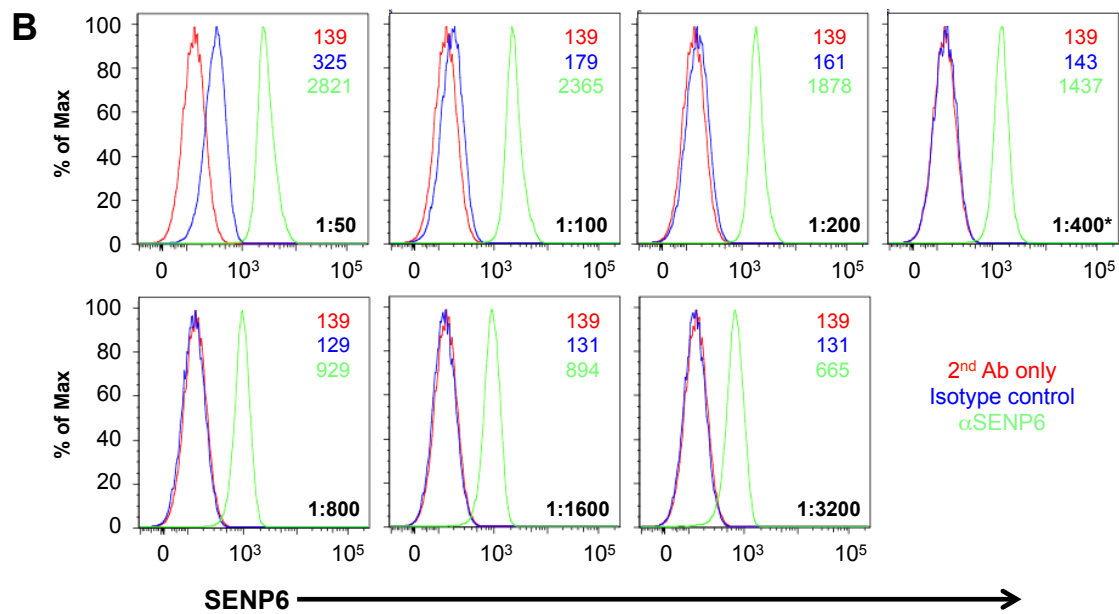

Figure S2: Tosti et al

A

| Genotype                      | # viable spores | % observed | % expected |
|-------------------------------|-----------------|------------|------------|
| WT                            | 12              | 27.3       | 25         |
| <i>msh2</i> Δ                 | 10              | 22.7       | 25         |
| <i>ulp1</i> Δ                 | 10              | 22.7       | 25         |
| <i>msh2</i> Δ / <i>ulp1</i> Δ | 12              | 27.3       | 25         |
| MISSING                       | 0               | 0          | 0          |
| <b>TOTAL</b>                  | <b>44</b>       | <b>100</b> | <b>100</b> |

B

| Genotype                      | # viable spores | % observed | % expected |
|-------------------------------|-----------------|------------|------------|
| WT                            | 39              | 26.4       | 25         |
| <i>msh2</i> Δ                 | 39              | 26.4       | 25         |
| <i>ulp2</i> Δ                 | 35              | 23.6       | 25         |
| <i>msh2</i> Δ / <i>ulp2</i> Δ | 1 *             | 0.7        | 25         |
| MISSING                       | 34              | 23         | 0          |
| <b>TOTAL</b>                  | <b>148</b>      | <b>100</b> | <b>100</b> |

C

| Genotype                                      | # viable spores | % observed | % expected |
|-----------------------------------------------|-----------------|------------|------------|
| WT                                            | 15              | 22.1       | 12.5       |
| <i>msh2</i> Δ                                 | 3               | 4.4        | 12.5       |
| <i>smt3</i> Δ                                 | 3               | 4.4        | 12.5       |
| <i>ulp2</i> Δ                                 | 10              | 14.7       | 12.5       |
| <i>smt3</i> Δ / <i>ulp2</i> Δ                 | 1 *             | 1.5        | 12.5       |
| <i>smt3</i> Δ / <i>msh2</i> Δ                 | 10              | 14.7       | 12.5       |
| <i>msh2</i> Δ / <i>ulp2</i> Δ                 | 0               | 0          | 12.5       |
| <i>smt3</i> Δ / <i>msh2</i> Δ / <i>ulp2</i> Δ | 16 **           | 23.5       | 12.5       |
| MISSING                                       | 10              | 14.7       | 0          |
| <b>TOTAL</b>                                  | <b>68</b>       | <b>100</b> | <b>100</b> |

D

| Genotype                                       | # viable spores | % observed | % expected |
|------------------------------------------------|-----------------|------------|------------|
| WT                                             | 22              | 20.4       | 12.5       |
| <i>msh2</i> Δ                                  | 16              | 14.8       | 12.5       |
| <i>nse2-SA</i>                                 | 12              | 11.1       | 12.5       |
| <i>ulp2</i> Δ                                  | 12              | 11.1       | 12.5       |
| <i>nse2-SA</i> / <i>ulp2</i> Δ                 | 7               | 6.5        | 12.5       |
| <i>nse2-SA</i> / <i>msh2</i> Δ                 | 13              | 12         | 12.5       |
| <i>msh2</i> Δ / <i>ulp2</i> Δ                  | 0               | 0          | 12.5       |
| <i>nse2-SA</i> / <i>msh2</i> Δ / <i>ulp2</i> Δ | 13              | 12         | 12.5       |
| MISSING                                        | 13              | 12         | 0          |
| <b>TOTAL</b>                                   | <b>108</b>      | <b>100</b> | <b>100</b> |

E

| Genotype                                      | # viable spores | % observed | % expected |
|-----------------------------------------------|-----------------|------------|------------|
| WT                                            | 13              | 11.2       | 12.5       |
| <i>msh2</i> Δ                                 | 20              | 17.2       | 12.5       |
| <i>pli1</i> Δ                                 | 14              | 12.1       | 12.5       |
| <i>ulp2</i> Δ                                 | 14              | 12.1       | 12.5       |
| <i>pli1</i> Δ / <i>ulp2</i> Δ                 | 12              | 10.3       | 12.5       |
| <i>pli1</i> Δ / <i>msh2</i> Δ                 | 10              | 8.6        | 12.5       |
| <i>msh2</i> Δ / <i>ulp2</i> Δ                 | 0               | 0          | 12.5       |
| <i>pli1</i> Δ / <i>msh2</i> Δ / <i>ulp2</i> Δ | 1               | 0.9        | 12.5       |
| MISSING                                       | 32              | 27.6       | 0          |
| <b>TOTAL</b>                                  | <b>116</b>      | <b>100</b> | <b>100</b> |

Small colony \*  
Smt3 & Msh2 are genetically linked \*\*
